# Supplementary material for: A new high-resolution groundwater isoscape for south-east Germany: insights from differences in relation to precipitation
Source: Copernicus journal article supplement (doi:10.5194/hess-29-3853-2025), 2025-08-19
Supplement: Supplementary file 1 [file hess-29-3853-2025-supplement.pdf]

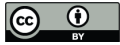

## *Supplement of*

# **A new high-resolution groundwater isoscape for south-east Germany: insights from differences in relation to precipitation**

**Aixala Gaillard et al.**

*Correspondence to:* Aixala Gaillard ([aixala.gaillard@fau.de](mailto:aixala.gaillard@fau.de))

The copyright of individual parts of the supplement might differ from the article licence.

## **Content**

Table S1: Input parameters for the empirical Bayesian Kriging algorithm in ArcGIS Pro 2.9.0.

Figure S1: Deuterium isoscape in groundwater

Figure S2:  $\delta^{18}\text{O}$  isoscape in precipitation

Figure S3: Altitude effect on groundwater  $\delta^{18}\text{O}$

**Table S1: Input parameters for the empirical Bayesian Kriging algorithm in ArcGIS Pro 2.9.0.**

| Parameter                                | Value             |
|------------------------------------------|-------------------|
| Output cell size                         | 1375.868 m        |
| Data transformation type                 | None              |
| Semivariogram model type                 | Power             |
| Max number of points in each local model | 100               |
| Local model area overlap factor          | 1                 |
| Number of simulated semivariograms       | 100               |
| Search Neighborhood                      | Standard circular |
| Max Neighbors                            | 15                |
| Min Neighbors                            | 10                |
| Sectortype                               | 1                 |
| Angle                                    | 0                 |
| Radius                                   | 124879.519 m      |

**Figure S1: Deuterium isoscape in groundwater**

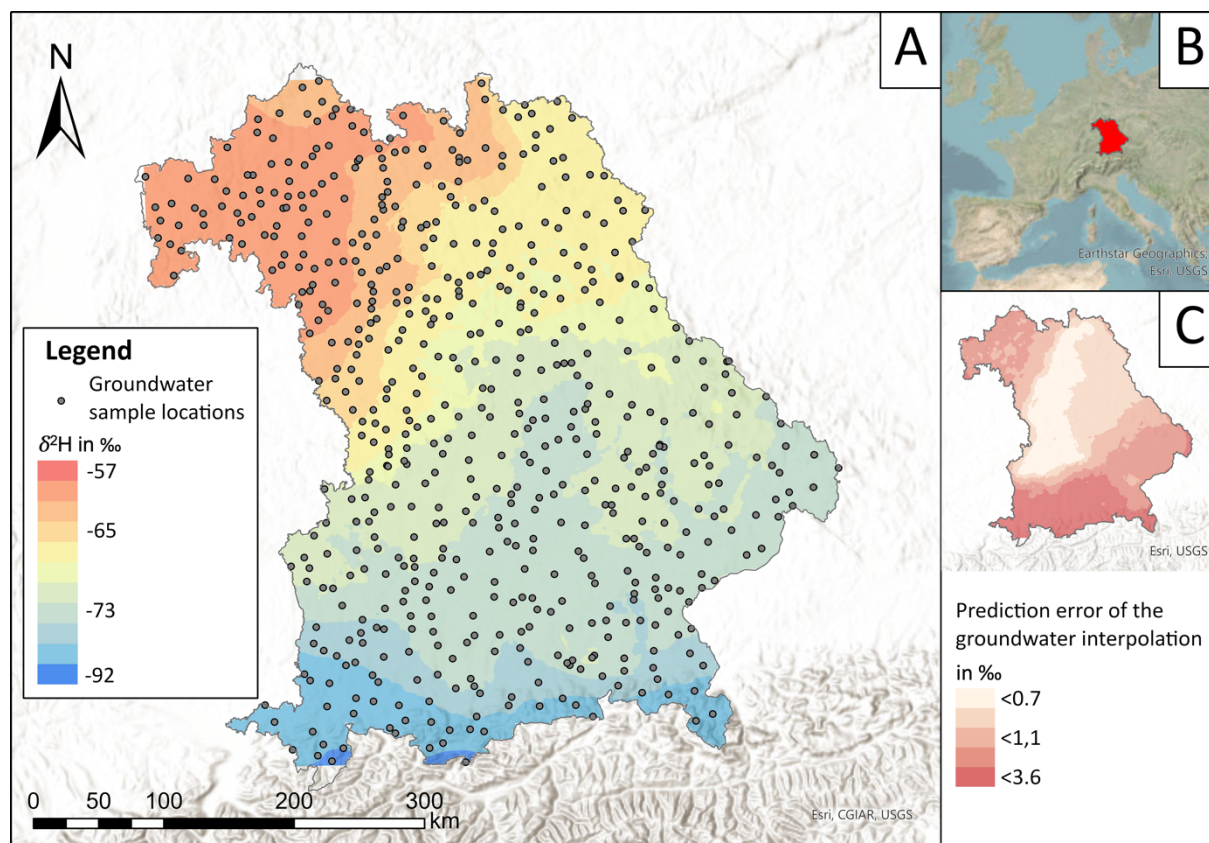

Figure S1: (a) Groundwater  $\delta^{18}\text{O}$ -isoscape (obtained with empirical Bayesian Kriging) with sample locations. (b) Location of the study area in Europe. (c) Standard error of the interpolation prediction in %.

Figure S2:  $\delta^{18}\text{O}$  isoscape in precipitation

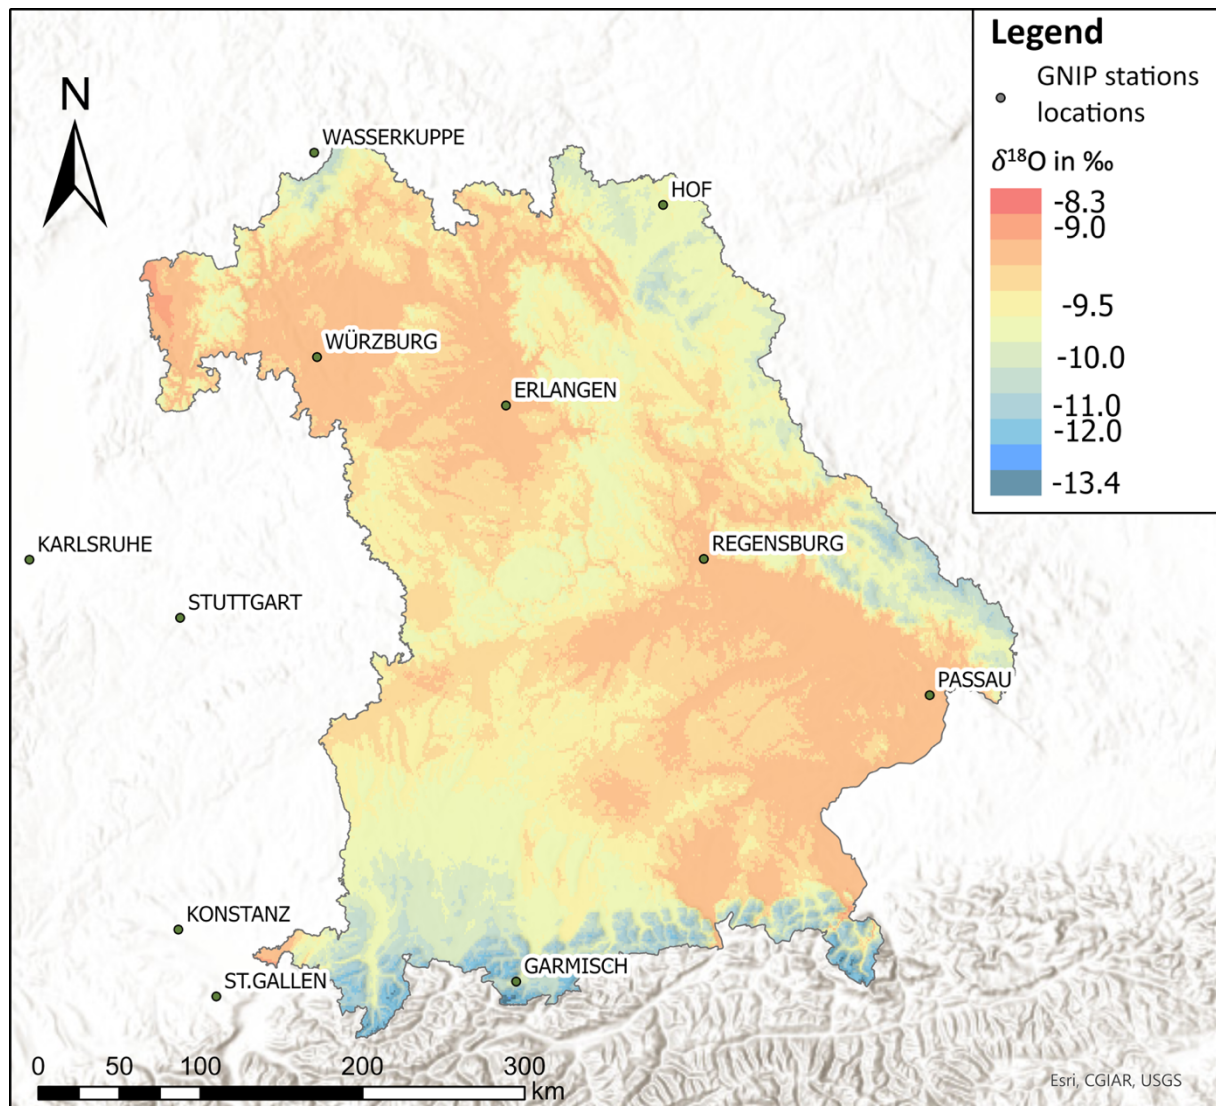

Figure S2: Isoscape of  $\delta^{18}\text{O}$ -values in precipitation (RCWIP model) and location of the 13 GNIP stations used for this study (isoscape adapted from Terzer et al. (2021)).

Figure S3: Altitude effect on groundwater  $\delta^{18}\text{O}$

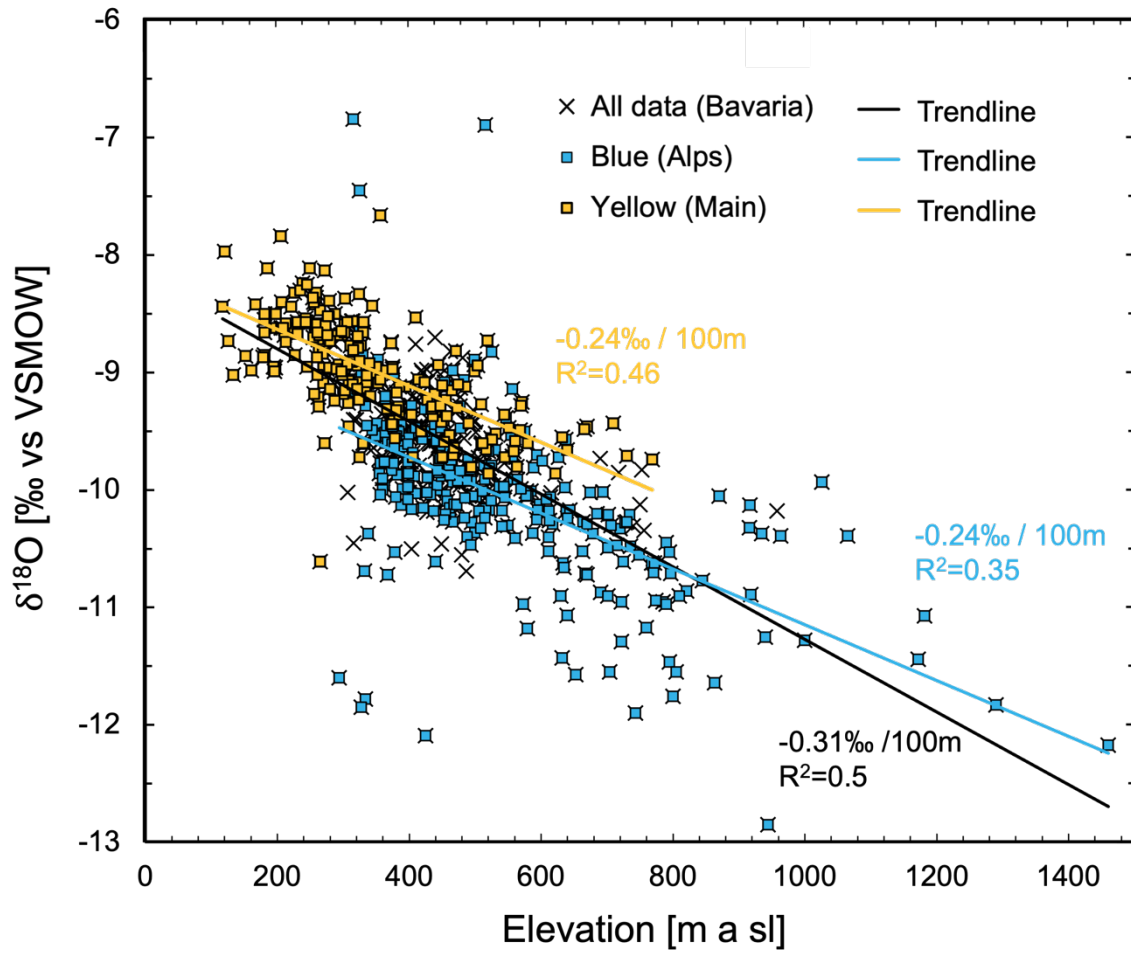

Figure S3:  $\delta^{18}\text{O}$  values in groundwater [‰ vs V-SMOW] in relation to the station's elevation [m a sl] for all data in our study area (black crosses and trendline), the stations within the alpine cluster (blue squares and trendline) and the stations in the Main cluster (yellow squares and trendline). The corresponding slopes and of the trendlines are given in  $\delta^{18}\text{O}$  ‰ per 100 m elevation.
